# Supplementary material for: Plant beta-diversity across biomes captured by imaging spectroscopy
Source: PubMed Central journal article supplement (PMC9120498; doi:10.1038/s41467-022-30369-6), 2022-05-19
Supplement: 41467_2022_30369_MOESM1_ESM.pdf [file 41467_2022_30369_MOESM1_ESM.pdf]

## Supplementary Information

### Plant beta-diversity across biomes captured by imaging spectroscopy

Schweiger, A.K. & Laliberté, E.

#### Content

- **Supplementary Fig. 1:** Synthetic landscape consisting of 24 20 m × 20 m plant communities (research plots) at the University of Kansas Field Station.
- **Supplementary Fig. 2:** Pairwise spectral distance among plots increases with their taxonomic distance.
- **Supplementary Fig. 3:** Relationships between plant diversity and spectral diversity at the alpha-scale per site.
- **Supplementary Fig. 4:** Scaling plant inventories to vegetation cover as seen from above.
- **Supplementary Table 1:** NEON sites used in this study, site characteristics.
- **Supplementary Table 2:** Linear regression models between taxonomic and spectral distances among plots per site.
- **Supplementary Table 3:** Covariance between plot-wise ordinations of plant species inventories and mean spectra per site.
- **Supplementary Table 4:** Best mixed effects model predicting plant species richness.
- **Supplementary Table 5:** Best mixed effects model predicting the Shannon index of plant diversity.
- **Supplementary Table 6:** Best mixed effects model predicting plant phylogenetic diversity.
- **Supplementary References**

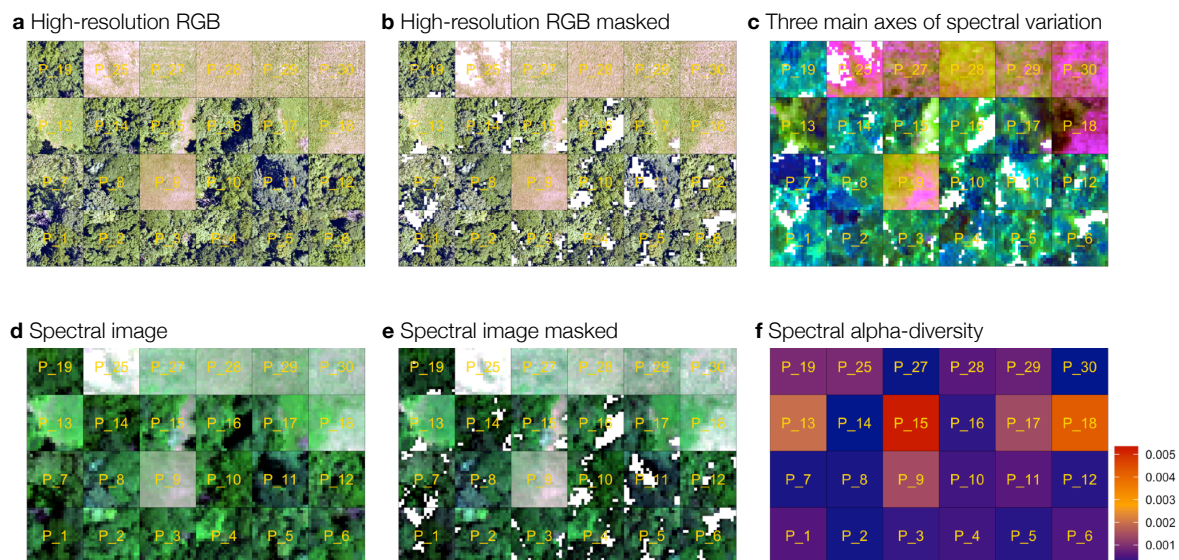

**Supplementary Fig. 1: Synthetic landscape consisting of 24 20 m x 20 m plant communities (research plots) at the University of Kansas Field Station. a** High-resolution true color images (RGB) with and **b** without masked pixels, **c** the three main axes of spectral variation, **d** spectral RGB images with and **e** without masked pixels, **f** spectral alpha-diversity, colors represent a gradient from low (blue) to high (red) spectral alpha-diversity values.

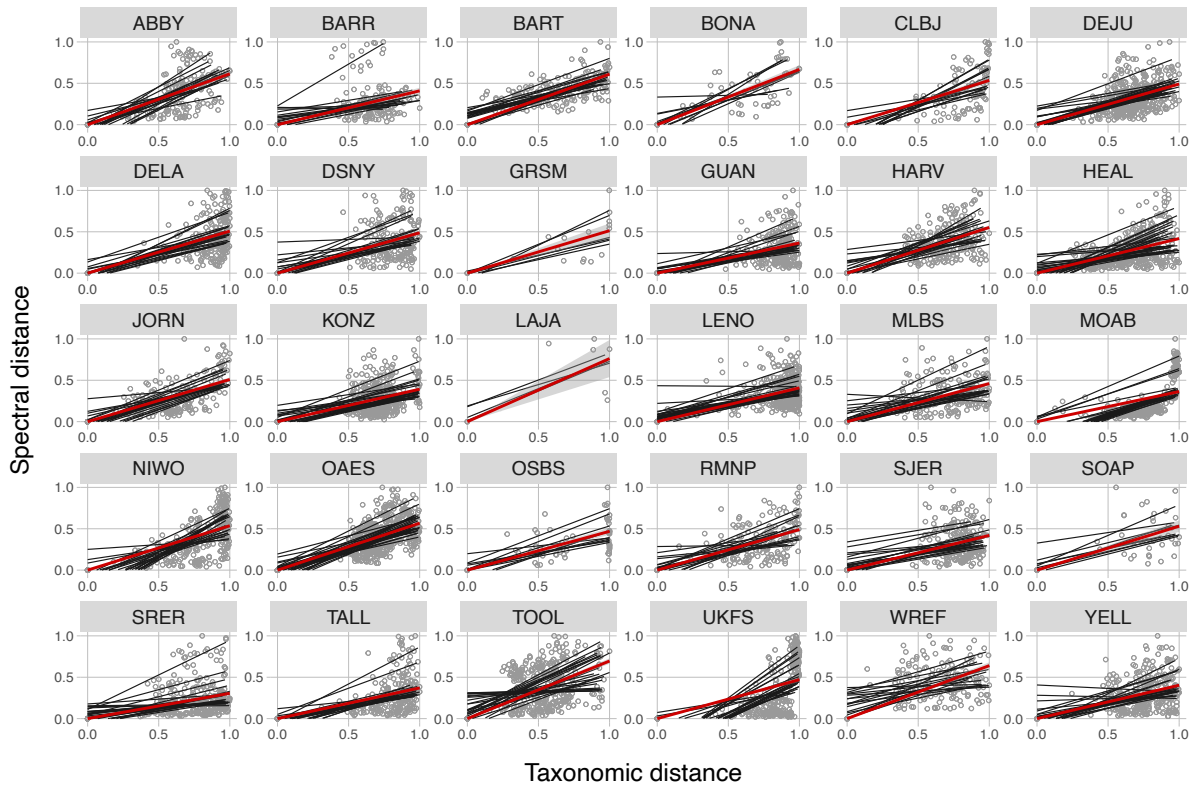

**Supplementary Fig. 2: Pairwise spectral distance among plots increases with their taxonomic distance.**

The red line is the mean fitted regression line for all plots per NEON site; bands indicate 95% confidence intervals. Grey lines represent fitted linear regression models predicting for each plot per site spectral distance from taxonomic distance; circles represent plots. For site abbreviations see Supplementary Table 1, for statistics see Supplementary Table 2.

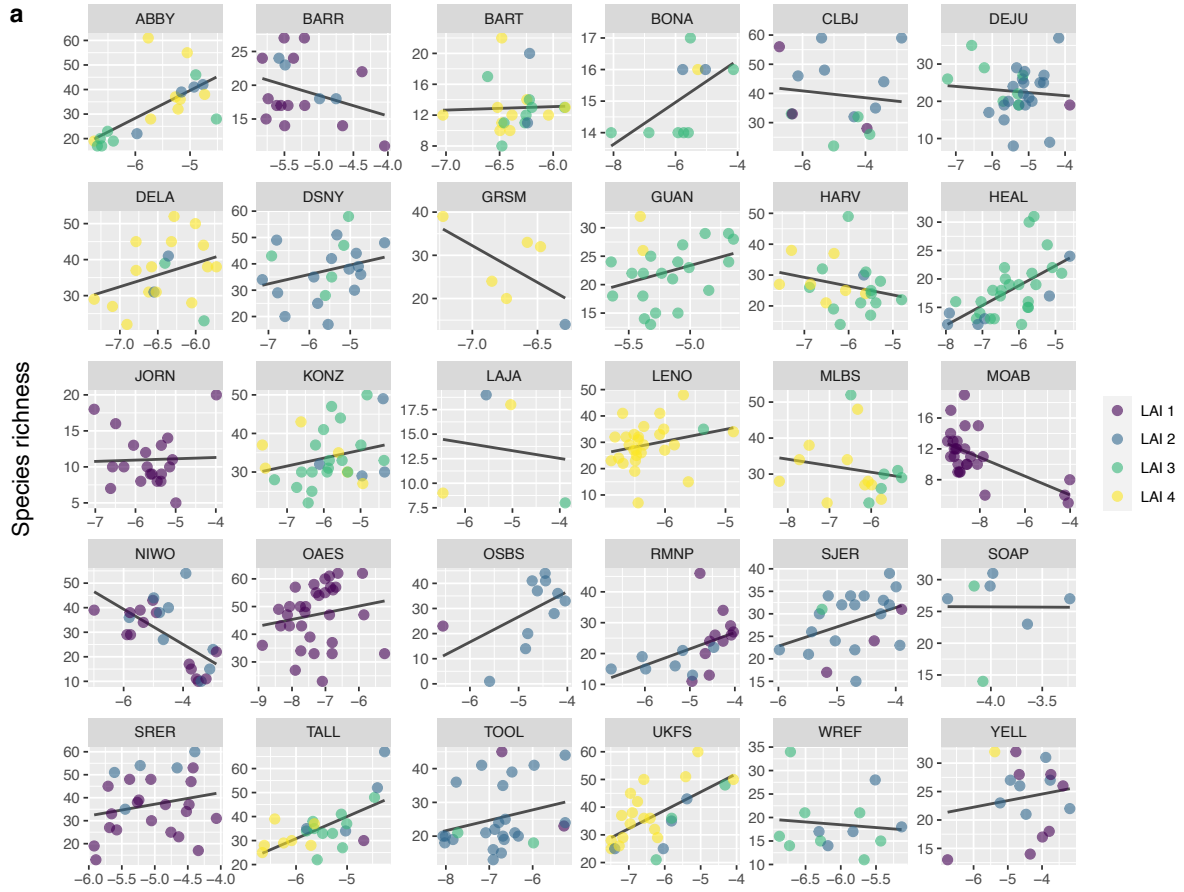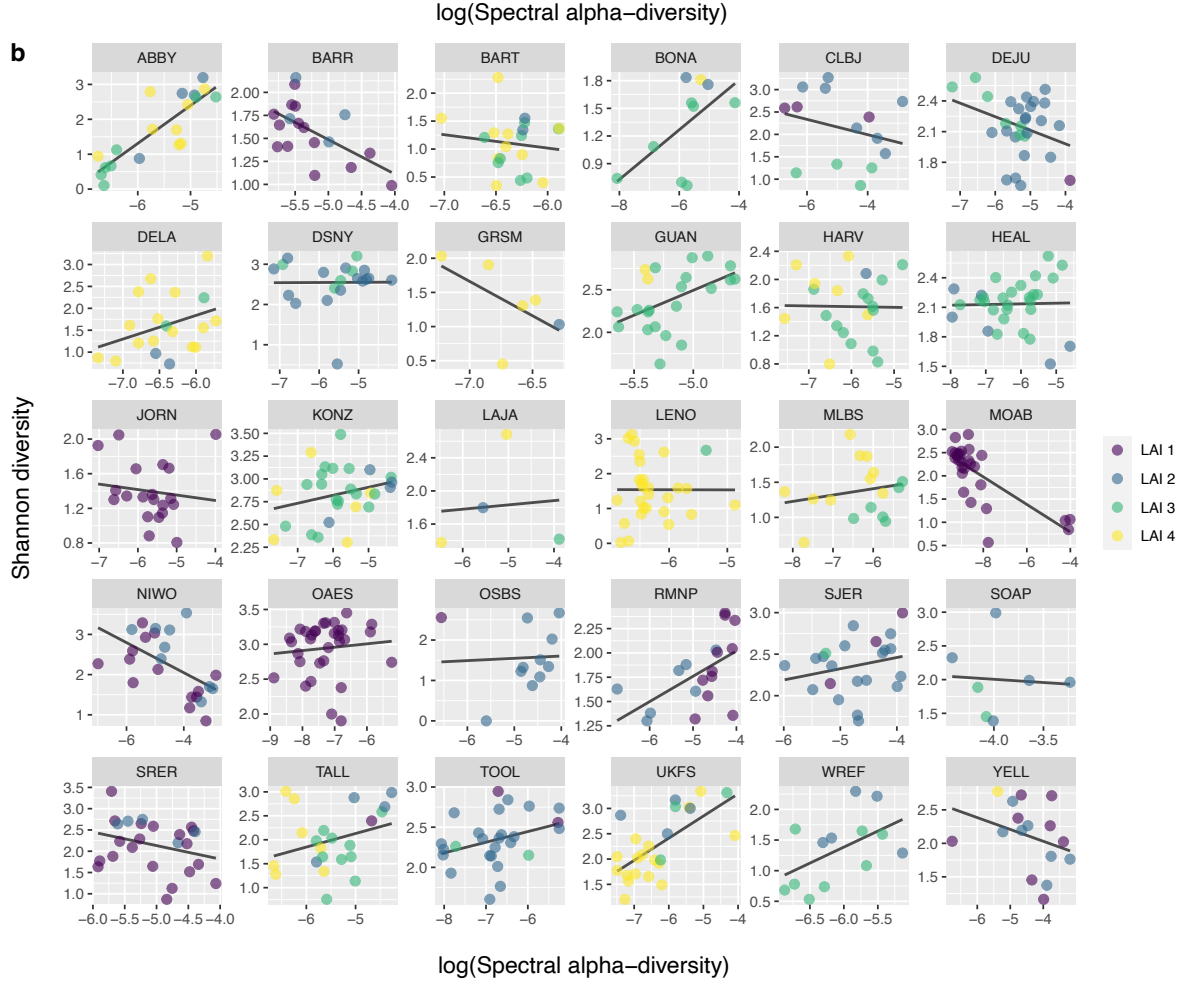

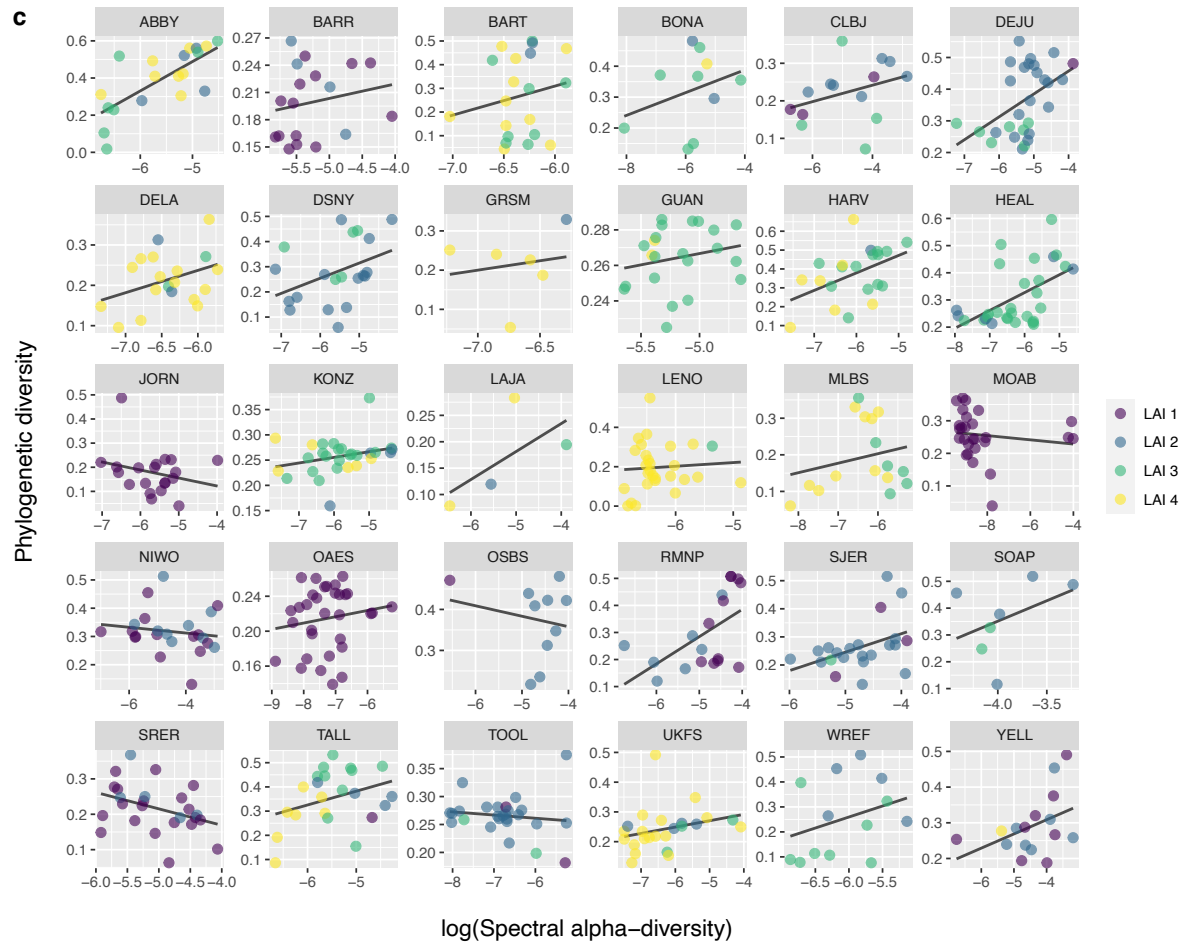

**Supplementary Fig. 3: Relationships between plant diversity and spectral diversity at the alpha-scale per site.** Relationships between spectral alpha-diversity and measured **a** plant species richness, **b** Shannon index and **c** phylogenetic diversity. As phylogenetic diversity measure, we used phylogenetic species evenness (PSE). Colors represent four classes of the leaf area index (LAI) ranging from open to closed canopies: LAI 1 = [0.13, 0.634], LAI 2 = (0.634, 1.183], LAI 3 = (1.183, 1.84], LAI 4 = (1.84, 3.80], NS:  $P > 0.1$ ); the black line shows the overall relationship per site, for site abbreviations see Supplementary Table 1.

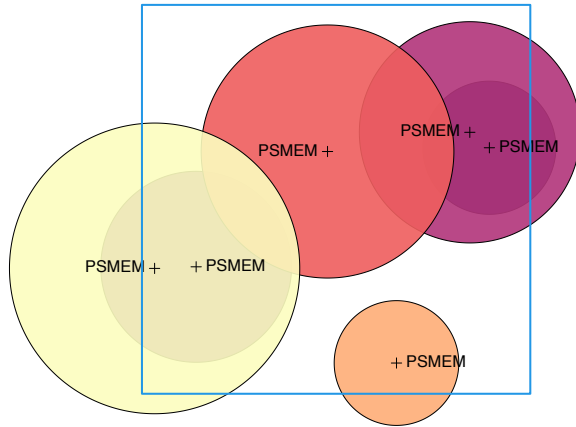

**Supplementary Fig. 4: Scaling plant inventories to vegetation cover as seen from above.** Similar to this example of plot 1 (delineated by the blue square) at the Abby Road site, we mapped all trees per plot based on their location, height and crown diameter. We calculated the area within the plot covered by each tree species, and scaled percent cover of herbaceous and understory plants to the area within the plot not covered by trees (white area within the blue square).

**Supplementary Table 1: NEON sites used in this study.**

| Site ID | Site Name                                        | State | Elevation | MAP     | MAT        | Domain Name                       | Latitude | Longitude  | LAI  |
|---------|--------------------------------------------------|-------|-----------|---------|------------|-----------------------------------|----------|------------|------|
| ABBY    | Abby Road                                        | WA    | 363 m     | 2530 mm | 8C/46.4F   | Pacific Northwest                 | 45.76243 | -122.33033 | 1.78 |
| BARR    | Barrow Environmental Observatory                 | AK    | 6 m       | 110 mm  | -12C/10.4F | Tundra                            | 71.28241 | -156.61936 | 0.52 |
| BART    | Bartlett Experimental Forest                     | NH    | 232 m     | 1056 mm | 8C/46.4F   | Northeast                         | 44.06388 | -71.28731  | 1.90 |
| BONA    | Caribou-Poker Creeks Research Watershed          | AK    | 263 m     | 399 mm  | -1C/30.2F  | Taiga                             | 65.15401 | -147.50258 | 1.38 |
| CLBJ    | LBJ National Grassland                           | TX    | 259 m     | 840 mm  | 18C/64.4F  | Southern Plains                   | 33.40123 | -97.57000  | 0.94 |
| DEJU    | Delta Junction                                   | AK    | 529 m     | 300 mm  | -2C/28.4F  | Taiga                             | 63.88112 | -145.75136 | 1.07 |
| DELA    | Dead Lake                                        | AL    | 22 m      | 1290 mm | 18C/64.4F  | Ozarks Complex                    | 32.54172 | -87.80389  | 2.39 |
| DSNY    | Disney Wilderness Preserve                       | FL    | 15 m      | 1150 mm | 22C/71.6F  | Southeast                         | 28.12504 | -81.43620  | 1.10 |
| GRSM    | Great Smoky Mountains National Park, Twin Creeks | TN    | 579 m     | 1396 mm | 13C/55.4F  | Appalachians & Cumberland Plateau | 35.68896 | -83.50195  | 2.72 |
| GUAN    | Guanica Forest                                   | PR    | 143 m     | 1168 mm | 25C/77F    | Atlantic Neotropical              | 17.96955 | -66.86870  | 1.55 |
| HARV    | Harvard Forest                                   | MA    | 351 m     | 967 mm  | 8C/46.4F   | Northeast                         | 42.53690 | -72.17266  | 1.70 |
| HEAL    | Healy                                            | AK    | 705 m     | 320 mm  | -4C/24.8F  | Taiga                             | 63.87569 | -149.21334 | 1.31 |
| JORN    | Jornada LTER                                     | NM    | 1329 m    | 173 mm  | 17C/62.6F  | Desert Southwest                  | 32.59068 | -106.84254 | 0.20 |
| KONZ    | Konza Prairie Biological Station                 | KS    | 381 m     | 860 mm  | 12C/53.6F  | Prairie Peninsula                 | 39.10077 | -96.56309  | 1.63 |
| LAJA    | Lajas Experimental Station                       | PR    | 24 m      | 1168 mm | 25C/77F    | Atlantic Neotropical              | 18.02125 | -67.07690  | 1.55 |
| LENO    | Lenoir Landing                                   | AL    | 20 m      | 1429 mm | 18C/64.4F  | Ozarks Complex                    | 31.85388 | -88.16122  | 2.60 |
| MLBS    | Mountain Lake Biological Station                 | VA    | 1126 m    | 1030 mm | 13C/55.4F  | Appalachians & Cumberland Plateau | 37.37828 | -80.52484  | 2.07 |
| MOAB    | Moab                                             | UT    | 1767 m    | 200 mm  | 11C/51.8F  | S-Rockies & Colorado Plateau      | 38.24833 | -109.38827 | 0.27 |
| NIWO    | Niwot Ridge Mountain Research Station            | CO    | 3513 m    | 758 mm  | 0C/32F     | S-Rockies & Colorado Plateau      | 40.05425 | -105.58237 | 0.58 |
| OAES    | Klemme Range Research Station                    | OK    | 516 m     | 670 mm  | 15C/59F    | Southern Plains                   | 35.41059 | -99.05879  | 0.24 |
| OSBS    | Ordway-Swisher Biological Station                | FL    | 45 m      | 1290 mm | 20C/68F    | Southeast                         | 29.68927 | -81.99343  | 0.92 |
| RMNP    | Rocky Mountain National Park, CASTNET            | CO    | 2743 m    | 520 mm  | 4C/39.2F   | Central Plains                    | 40.27591 | -105.54592 | 0.60 |
| SJER    | San Joaquin Experimental Range                   | CA    | 368 m     | 270 mm  | 17C/62.6F  | Pacific Southwest                 | 37.10878 | -119.73228 | 0.76 |
| SOAP    | Soaproot Saddle                                  | CA    | 1160 m    | 1246 mm | 10C/50F    | Pacific Southwest                 | 37.03337 | -119.26219 | 0.95 |
| SRER    | Santa Rita Experimental Range                    | AZ    | 983 m     | 290 mm  | 20C/68F    | Desert Southwest                  | 31.91068 | -110.83549 | 0.51 |
| TALL    | Talladega National Forest                        | AL    | 135 m     | 1350 mm | 17C/62.6F  | Ozarks Complex                    | 32.95046 | -87.39327  | 1.62 |
| TOOL    | Toolik                                           | AK    | 843 m     | 331 mm  | -4C/24.8F  | Tundra                            | 68.66109 | -149.37047 | 0.93 |
| UKFS    | The University of Kansas Field Station           | KS    | 335 m     | 870 mm  | 12C/53.6F  | Prairie Peninsula                 | 39.04043 | -95.19215  | 2.36 |
| WREF    | Wind River Experimental Forest                   | WA    | 407 m     | 2530 mm | 8C/46.4F   | Pacific Northwest                 | 45.82049 | -121.95191 | 1.32 |
| YELL    | Yellowstone Northern Range (Frog Rock)           | WY    | 2116 m    | 509 mm  | 0C/32F     | Northern Rockies                  | 44.95348 | -110.53914 | 0.77 |

Site characteristics including site abbreviation (Site ID), mean annual precipitation (MAP), mean annual temperature (MAT), latitude, longitude (WGS 84) and mean leaf area index (LAI).

**Supplementary Table 2: Linear regression models between taxonomic and spectral distances among plots per site.**

| Site ID | n  | $r^2$ | estimate ( <i>b</i> ) | <i>P</i> (sign.) | statistic ( <i>t</i> ) | <i>df</i> |
|---------|----|-------|-----------------------|------------------|------------------------|-----------|
| ABBY    | 19 | 0.34  | 0.61                  | <0.001 (***)     | 35.34                  | 341       |
| BARR    | 18 | 0.01  | 0.41                  | <0.001 (***)     | 20.99                  | 305       |
| BART    | 20 | 0.42  | 0.61                  | <0.001 (***)     | 59.49                  | 379       |
| BONA    | 11 | 0.50  | 0.67                  | <0.001 (***)     | 24.57                  | 109       |
| CLBJ    | 14 | 0.36  | 0.54                  | <0.001 (***)     | 26.14                  | 181       |
| DEJU    | 28 | 0.22  | 0.49                  | <0.001 (***)     | 53.91                  | 755       |
| DELA    | 20 | 0.22  | 0.51                  | <0.001 (***)     | 38.60                  | 379       |
| DSNY    | 20 | 0.13  | 0.49                  | <0.001 (***)     | 33.37                  | 379       |
| GRSM    | 6  | 0.50  | 0.51                  | <0.001 (***)     | 10.82                  | 29        |
| GUAN    | 22 | 0.13  | 0.36                  | <0.001 (***)     | 36.63                  | 461       |
| HARV    | 21 | 0.23  | 0.55                  | <0.001 (***)     | 42.41                  | 419       |
| HEAL    | 30 | 0.28  | 0.42                  | <0.001 (***)     | 50.86                  | 869       |
| JORN    | 20 | 0.43  | 0.51                  | <0.001 (***)     | 38.95                  | 379       |
| KONZ    | 28 | 0.15  | 0.39                  | <0.001 (***)     | 46.26                  | 755       |
| LAJA    | 4  | 0.38  | 0.76                  | <0.001 (***)     | 6.19                   | 11        |
| LENO    | 28 | 0.14  | 0.41                  | <0.001 (***)     | 59.55                  | 755       |
| MLBS    | 20 | 0.13  | 0.46                  | <0.001 (***)     | 34.15                  | 379       |
| MOAB    | 27 | 0.34  | 0.36                  | <0.001 (***)     | 40.00                  | 701       |
| NIWO    | 23 | 0.39  | 0.54                  | <0.001 (***)     | 45.26                  | 505       |
| OAES    | 32 | 0.30  | 0.57                  | <0.001 (***)     | 79.29                  | 991       |
| OSBS    | 11 | 0.36  | 0.47                  | <0.001 (***)     | 20.87                  | 109       |
| RMNP    | 18 | 0.27  | 0.49                  | <0.001 (***)     | 32.04                  | 305       |
| SJER    | 22 | 0.08  | 0.42                  | <0.001 (***)     | 35.23                  | 461       |
| SOAP    | 9  | 0.20  | 0.53                  | <0.001 (***)     | 14.44                  | 71        |
| SRER    | 25 | 0.05  | 0.31                  | <0.001 (***)     | 28.81                  | 599       |
| TALL    | 22 | 0.17  | 0.37                  | <0.001 (***)     | 30.77                  | 461       |
| TOOL    | 26 | 0.07  | 0.70                  | <0.001 (***)     | 40.79                  | 649       |
| UKFS    | 24 | 0.26  | 0.47                  | <0.001 (***)     | 32.94                  | 551       |
| WREF    | 18 | -0.04 | 0.64                  | <0.001 (***)     | 30.65                  | 305       |
| YELL    | 25 | 0.12  | 0.40                  | <0.001 (***)     | 39.08                  | 599       |

Significance was assessed using two-sided t-tests. The number of observations per site (*n*), proportion of variance explained ( $r^2$ ), estimates of the slope (*b*), *P*-values and significance levels (\*\*\*)  $P \leq 0.001$ , \*\*  $P \leq 0.01$ , \*  $P \leq 0.05$ ), test statistics (*t*) and degrees of freedom (*df*) are indicated. For site abbreviations see Supplementary Table 1.



**Supplementary Table 3: Covariance between plot-wise ordinations of plant species inventories and mean spectra per site.**

| Site ID | n  | <i>RV</i> | <i>P</i> (sign) |
|---------|----|-----------|-----------------|
| ABBY    | 19 | 0.63      | 0.001 (***)     |
| BARR    | 18 | 0.31      | 0.048 (*)       |
| BART    | 20 | 0.59      | 0.001 (***)     |
| BONA    | 11 | 0.70      | 0.004 (**)      |
| CLBJ    | 14 | 0.66      | 0.001 (***)     |
| DEJU    | 28 | 0.22      | 0.027 (*)       |
| DELA    | 20 | 0.34      | 0.012 (*)       |
| DSNY    | 20 | 0.27      | 0.073           |
| GRSM    | 6  | 0.64      | 0.021 (*)       |
| GUAN    | 22 | 0.30      | 0.018 (*)       |
| HARV    | 21 | 0.41      | 0.002 (**)      |
| HEAL    | 30 | 0.52      | 0.001 (***)     |
| JORN    | 20 | 0.38      | 0.003 (**)      |
| KONZ    | 28 | 0.19      | 0.146           |
| LAJA    | 4  | 0.38      | 0.918           |
| LENO    | 28 | 0.24      | 0.052           |
| MLBS    | 20 | 0.44      | 0.003 (**)      |
| MOAB    | 27 | 0.62      | 0.001 (***)     |
| NIWO    | 23 | 0.66      | 0.001 (***)     |
| OAES    | 32 | 0.42      | 0.001 (***)     |
| OSBS    | 11 | 0.53      | 0.013 (*)       |
| RMNP    | 18 | 0.49      | 0.004 (**)      |
| SJER    | 22 | 0.16      | 0.523           |
| SOAP    | 9  | 0.29      | 0.424           |
| SRER    | 25 | 0.29      | 0.007 (**)      |
| TALL    | 22 | 0.30      | 0.009 (**)      |
| TOOL    | 26 | 0.29      | 0.004 (**)      |
| UKFS    | 24 | 0.71      | 0.001 (***)     |
| WREF    | 18 | 0.25      | 0.088           |
| YELL    | 25 | 0.30      | 0.008 (**)      |

For each site, the degree of correspondence between ordinations of plant inventories and mean spectra per plot is given by the coefficient of association (*RV*)<sup>50</sup>. Number of observations per site (n), *P*-values and significance levels (\*\*\*)  $P \leq 0.001$ , \*\*  $P \leq 0.01$ , \*  $P \leq 0.05$ ) are averages of 999 Monte-Carlo simulations. For site abbreviations see Supplementary Table 1.

**Supplementary Table 4: Best mixed effects model predicting plant species richness.**

| <b>Term</b>               | <b>statistic (F, df)</b> | <b>P (sign)</b> |
|---------------------------|--------------------------|-----------------|
| Intercept                 | 383.35 (1, 545)          | <0.001 (***)    |
| SDalpha                   | 9.23 (1, 545)            | 0.003 (**)      |
| Vegtype                   | 6.48 (2, 545)            | 0.002 (**)      |
| Latitude                  | 4.15 (1, 545)            | 0.042 (*)       |
| meanLAI                   | 12.79 (1, 545)           | <0.001 (***)    |
| Elevation                 | 0.01 (1, 24)             | 0.907           |
| Temperature               | 0.06 (1, 24)             | 0.805           |
| Precipitation             | 0.58 (1, 24)             | 0.455           |
| Vegtype:Latitude          | 6.35 (2, 545)            | 0.002 (**)      |
| Vegtype:Elevation         | 21.82 (2, 545)           | <0.001 (***)    |
| Vegtype:Temperature       | 2.55 (2, 545)            | 0.079 (•)       |
| Vegtype:Precipitation     | 4.98 (2, 545)            | 0.007 (**)      |
| Latitude:Precipitation    | 0.72 (1, 545)            | 0.396           |
| Elevation:Precipitation   | 5.18 (1, 24)             | 0.032           |
| Temperature:Precipitation | 16.35 (1, 24)            | <0.001 (***)    |

The terms included in the model are spectral alpha-diversity (SDalpha), vegetation type (Vegtype: forest, grassland, shrubland), latitude, mean leaf area index (meanLAI), elevation, mean annual temperature and mean annual precipitation. Analysis-of-variance (ANOVA) results showing the test statistic (two-sided *F*-test), degrees of freedom (*df*), *P*-values and significance levels (\*\*\*)  $P \leq 0.001$ , \*\*  $P \leq 0.01$ , \*  $P \leq 0.05$ , •  $P \leq 0.1$ ).

**Supplementary Table 5: Best mixed effects model predicting the Shannon index of plant diversity.**

| Term                  | statistic ( <i>F</i> , <i>df</i> ) | <i>P</i> (sign) |
|-----------------------|------------------------------------|-----------------|
| Intercept             | 497.79 (1, 544)                    | <0.001 (***)    |
| SDalpha               | 0.72 (1, 544)                      | 0.398           |
| Vegtype               | 36.4 (2, 544)                      | <0.001 (***)    |
| Latitude              | 0.99 (1, 544)                      | 0.320           |
| meanLAI               | 0.02 (1, 544)                      | 0.891           |
| Elevation             | 0.14 (1, 26)                       | 0.709           |
| Temperature           | 0.1 (1, 26)                        | 0.758           |
| Precipitation         | 0.74 (1, 26)                       | 0.397           |
| SDalpha:Latitude      | 0.01 (1, 544)                      | 0.915           |
| SDalpha:Temperature   | 6.16 (1, 544)                      | 0.013 (*)       |
| SDalpha:Precipitation | 37.05 (1, 544)                     | <0.001 (***)    |
| Vegtype:Elevation     | 7.32 (2, 544)                      | 0.001 (***)     |
| Vegtype:Temperature   | 0.07 (2, 544)                      | 0.931           |
| Vegtype:Precipitation | 6.04 (2, 544)                      | 0.003 (**)      |
| meanLAI:Elevation     | 3.45 (1, 544)                      | 0.064 (•)       |

The terms included in the model are spectral alpha-diversity (SDalpha), vegetation type (Vegtype: forest, grassland, shrubland), latitude, mean leaf area index (meanLAI), elevation, mean annual temperature and mean annual precipitation. Analysis-of-variance (ANOVA) results showing the test statistic (two-sided *F*-test), degrees of freedom (*df*), *P*-values and significance levels (\*\*\*)  $P \leq 0.001$ , \*\*  $P \leq 0.01$ , \*  $P \leq 0.05$ , •  $P \leq 0.1$ ).

**Supplementary Table 6: Best mixed effects model predicting plant phylogenetic diversity.**

| Term                      | statistic ( <i>F</i> , <i>df</i> ) | <i>P</i> (sign) |
|---------------------------|------------------------------------|-----------------|
| Intercept                 | 1282.07 (1, 535)                   | <0.001 (***)    |
| SDalpha                   | 34.77 (1, 535)                     | <0.001 (***)    |
| Vegtype                   | 2.28 (2, 535)                      | 0.104           |
| Latitude                  | 6.14 (1, 535)                      | 0.014 (*)       |
| meanLAI                   | 7.08 (1, 535)                      | 0.008 (**)      |
| Elevation                 | 0.02 (1, 24)                       | 0.883           |
| Temperature               | 0.41 (1, 24)                       | 0.528           |
| Precipitation             | 3.64 (1, 24)                       | 0.069 (•)       |
| SDalpha:Vegtype           | 5.52 (2, 535)                      | 0.004 (**)      |
| SDalpha:Latitude          | 3.78 (1, 535)                      | 0.052 (•)       |
| SDalpha:meanLAI           | 2.76 (1, 535)                      | 0.097 (•)       |
| SDalpha:Elevation         | 5.24 (1, 535)                      | 0.023 (*)       |
| SDalpha:Temperature       | 1.40 (1, 535)                      | 0.237           |
| SDalpha:Precipitation     | 19.82 (1, 535)                     | <0.001 (***)    |
| Vegtype:Latitude          | 1.63 (2, 535)                      | 0.196           |
| Vegtype:meanLAI           | 3.56 (2, 535)                      | 0.029 (*)       |
| Vegtype:Elevation         | 12.86 (2, 535)                     | <0.001 (***)    |
| Latitude:meanLAI          | 1.13 (1, 535)                      | 0.289           |
| Latitude:Temperature      | 3.38 (1, 535)                      | 0.067 (•)       |
| meanLAI:Elevation         | 0.003 (1, 535)                     | 0.956           |
| meanLAI:Temperature       | 4.96 (1, 535)                      | 0.026 (*)       |
| meanLAI:Precipitation     | 0.16 (1, 535)                      | 0.690           |
| Elevation:Precipitation   | 0.06 (1, 24)                       | 0.803           |
| Temperature:Precipitation | 0.07 (1, 24)                       | 0.793           |

The terms included in the model are spectral alpha-diversity (SDalpha), vegetation type (Vegtype: forest, grassland, shrubland), latitude, mean leaf area index (meanLAI), elevation, mean annual temperature and mean annual precipitation. As phylogenetic diversity measure, we used phylogenetic species evenness (PSE).

Analysis-of-variance (ANOVA) results showing the test statistic (two-sided *F*-test), degrees of freedom (*df*), *P*-values and significance levels (\*\*\*)  $P \leq 0.001$ , \*\*  $P \leq 0.01$ , \*  $P \leq 0.05$ , •  $P \leq 0.1$ ).

### Supplementary References

- 50 Heo, M. & Gabriel, K.R. A permutation test of association between configurations by means of the rv coefficient. *Communications in Statistics - Simulation and Computation* **27**, 843-856, doi:10.1080/03610919808813512 (1997).
